# Supplementary material for: 3D mixed ion/electron-conducting scaffolds for stable sodium metal anodes
Source: Royal Society of Chemistry journal article supplement (doi:10.1039/d3nr05814j), 2023-12-13
Supplement: d3nr05814j1.pdf [file d3nr05814j1.pdf]

**Table S1.** Electrochemical performance of representative studies on 3D composite Na-MIEC scaffold anodes.  
 Note: The N/P ratio is calculated based on the ratio of the areal capacity of the Na anode to that of the NVP cathode at the fully discharged state.

| Materials                                            | Areal capacities at current densities                | Time (h) | Electrolytes                         | Performance in NVP-based full cells        | N/P ratio |
|------------------------------------------------------|------------------------------------------------------|----------|--------------------------------------|--------------------------------------------|-----------|
| SnO <sub>2</sub> -CNFs <sup>78</sup>                 | 1 mA h cm <sup>-2</sup> at 1 mA cm <sup>-2</sup>     | 3000     | 1M NaPF <sub>6</sub>                 | 1C, 86.1 mAh cm <sup>-2</sup> , 130 cycles | 26.5      |
|                                                      | 5 mA h cm <sup>-2</sup> at 5 mA cm <sup>-2</sup>     | 1500     | in diglyme                           | 5C, 90 mAh cm <sup>-2</sup> , 400 cycles   | 25        |
| MgF <sub>2</sub> @rGO <sup>79</sup>                  | 0.5 mA h cm <sup>-2</sup> at 0.5 mA cm <sup>-2</sup> | 1600     | 1M NaClO <sub>4</sub>                | 1C, 79.88 mAh g <sup>-1</sup> , 200 cycles | 18.9      |
|                                                      |                                                      |          | in EC/DEC/FEC                        | 0.5C, 110 mAh g <sup>-1</sup> , 30 cycles  | 2.5       |
| IEDC <sup>80</sup>                                   | 1 mA h cm <sup>-2</sup> at 5 mA cm <sup>-2</sup>     | 250      | 1M NaPF <sub>6</sub>                 | 1C, 102.3 mAh g <sup>-1</sup> , 300 cycles | 1.56      |
|                                                      |                                                      |          | in diglyme                           | 0.5C, 90 mAh g <sup>-1</sup> , 100 cycles  | 0         |
| NiF <sub>2</sub> @NF <sup>81</sup>                   | 2 mA h cm <sup>-2</sup> at 2 mA cm <sup>-2</sup>     | 1600     | 1M NaPF <sub>6</sub><br>in diglyme   | 3C, 76.5 mAh g <sup>-1</sup> , 500 cycles  | 15        |
|                                                      | 4 mA h cm <sup>-2</sup> at 4 mA cm <sup>-2</sup>     | 800      |                                      | 5C, 70.9 mAh g <sup>-1</sup> , 300 cycles  | 16.6      |
|                                                      | 10 mA h cm <sup>-2</sup> at 5 mA cm <sup>-2</sup>    | 480      |                                      |                                            |           |
| NSCA-31 <sup>82</sup>                                | 1 mA h cm <sup>-2</sup> at 1 mA cm <sup>-2</sup>     | 700      | 1M NaCF <sub>3</sub> SO <sub>3</sub> | 1C, 86.84 mAh g <sup>-1</sup> , 300 cycles | /         |
|                                                      | 1 mA h cm <sup>-2</sup> at 2 mA cm <sup>-2</sup>     | 500      | in diglyme                           |                                            |           |
| SnSe@GF <sup>83</sup>                                | 1 mAh cm <sup>-2</sup> at 1 mA cm <sup>-2</sup>      | 2000     | 1M NaCF <sub>3</sub> SO <sub>3</sub> | 1C, 100 mAh g <sup>-1</sup> , 450 cycles   | 13.76     |
|                                                      | 5 mAh cm <sup>-2</sup> at 5 mA cm <sup>-2</sup>      | 900      | in diglyme                           | 5C, 70.3 mAh g <sup>-1</sup> , 100 cycles  | 16.5      |
| h-Ti <sub>3</sub> C <sub>2</sub> /CNTs <sup>36</sup> | 1 mAh cm <sup>-2</sup> at 1mA cm <sup>-2</sup>       | > 4000   | 1M NaOTF<br>in diglyme               | /                                          | /         |
| 3D-NVP <sup>84</sup>                                 | 1 mAh cm <sup>-2</sup> at 1 mA cm <sup>-2</sup>      | 300      | 1M NaClO <sub>4</sub>                | 10C, 93.6 mAh g <sup>-1</sup> , 500 cycles | /         |
|                                                      | 2 mAh cm <sup>-2</sup> at 1 mA cm <sup>-2</sup>      | 400      | in PC/FEC                            |                                            |           |
